# Supplementary material for: Strategic redesign of the central metabolism in Pseudomonas putida boosts NADPH generation and product formation
Source: Research Square preprint supplement (doi:10.21203/rs.3.rs-6821618/v1), 2025-06-18
Supplement: Supplementary file 1 [file 154b72ce86546dfd163b58a4.xlsx]

## Sheet: Table S1
	Organism	Strain	Characteristics	Experiment used	Source
	Escherichia coli	DH5α	F– endA1 glnV44 thi-1 recA1 relA1 gyrA96 deoR nupG purB20 φ80dlacZΔM15 Δ(lacZYA-argF)U169, hsdR17(rK–mK+), λ–		In-house strain
	Pseudomonas putida	KT2440	P. putida KT2440		In-house strain
	Escherichia coli	DH5α	E. coli DH5α with the pGNW-gcd	Cloning purposes (Section 1: Rewiring the metabolism of P. putida towards the Pentose Phosphate Pathway)	This work
	Escherichia coli	DH5α	E. coli DH5α with the pGNW-edd	Cloning purposes (Section 1: Rewiring the metabolism of P. putida towards the Pentose Phosphate Pathway)	This work
	Escherichia coli	DH5α	E. coli DH5α with the pGNW-hexR	Cloning purposes (Section 1: Rewiring the metabolism of P. putida towards the Pentose Phosphate Pathway)	This work
	Escherichia coli	DH5α	E. coli DH5α with p1P	Cloning purposes (Section 1: Rewiring the metabolism of P. putida towards the Pentose Phosphate Pathway)	This work
	Escherichia coli	DH5α	E. coli DH5α with p2P	Cloning purposes (Section 1: Rewiring the metabolism of P. putida towards the Pentose Phosphate Pathway)	This work
	Escherichia coli	DH5α	E. coli DH5α with p3P	Cloning purposes (Section 1: Rewiring the metabolism of P. putida towards the Pentose Phosphate Pathway)	This work
	Escherichia coli	DH5α	E. coli DH5α with p4P	Cloning purposes (Section 1: Rewiring the metabolism of P. putida towards the Pentose Phosphate Pathway)	This work
	Escherichia coli	DH5α	E. coli DH5α with p5P	Cloning purposes (Section 1: Rewiring the metabolism of P. putida towards the Pentose Phosphate Pathway)	This work
	Escherichia coli	DH5α	E. coli DH5α with p6P	Cloning purposes (Section 1: Rewiring the metabolism of P. putida towards the Pentose Phosphate Pathway)	This work
	Escherichia coli	DH5α	E. coli DH5α with p7P	Cloning purposes (Section 1: Rewiring the metabolism of P. putida towards the Pentose Phosphate Pathway)	This work
	Escherichia coli	DH5α	E. coli DH5α with p8P	Cloning purposes (Section 1: Rewiring the metabolism of P. putida towards the Pentose Phosphate Pathway)	This work
	Escherichia coli	DH5α	E. coli DH5α with p9P	Cloning purposes (Section 1: Rewiring the metabolism of P. putida towards the Pentose Phosphate Pathway)	This work
	Escherichia coli	DH5α	E. coli DH5α with p10P	Cloning purposes (Section 1: Rewiring the metabolism of P. putida towards the Pentose Phosphate Pathway)	This work
	Escherichia coli	DH5α	E. coli DH5α with p11P	Cloning purposes (Section 1: Rewiring the metabolism of P. putida towards the Pentose Phosphate Pathway)	This work
	Escherichia coli	DH5α	E. coli DH5α with p1B	Cloning purposes (Section 1: Rewiring the metabolism of P. putida towards the Pentose Phosphate Pathway)	This work
	Escherichia coli	DH5α	E. coli DH5α with p1E	Cloning purposes (Section 1: Rewiring the metabolism of P. putida towards the Pentose Phosphate Pathway)	This work
	Escherichia coli	DH5α	E. coli DH5α with p2E	Cloning purposes (Section 1: Rewiring the metabolism of P. putida towards the Pentose Phosphate Pathway)	This work
	Escherichia coli	DH5α	E. coli DH5α with p3E	Cloning purposes (Section 1: Rewiring the metabolism of P. putida towards the Pentose Phosphate Pathway)	This work
	Escherichia coli	DH5α	E. coli DH5α with p4E	Cloning purposes (Section 1: Rewiring the metabolism of P. putida towards the Pentose Phosphate Pathway)	This work
	Escherichia coli	DH5α	E. coli DH5α with pSEVAb62-mBFP	Cloning purposes (Section 2: Elevated NADPH Levels in P. putida ΔgcdΔeddΔhexR strains through PP Pathway Redirection)	This work
	Escherichia coli	DH5α	E. coli DH5α with pGNW-gapA	Cloning purposes (Section 3: In vitro essays revealed that P. putida produces NADPH in the conversion of G3P to 3PG)	This work
	Escherichia coli	DH5α	E. coli DH5α with pGNW-gapB	Cloning purposes (Section 3: In vitro essays revealed that P. putida produces NADPH in the conversion of G3P to 3PG)	This work
	Escherichia coli	DH5α	E. coli DH5α with pGNW-PP_3443	Cloning purposes (Section 3: In vitro essays revealed that P. putida produces NADPH in the conversion of G3P to 3PG)	This work
	Escherichia coli	DH5α	E. coli DH5α with pGNW-PP_0665	Cloning purposes (Section 3: In vitro essays revealed that P. putida produces NADPH in the conversion of G3P to 3PG)	This work
	Escherichia coli	DH5α	E. coli DH5α with pJT-hmfH	Cloning purposes (Section 4: P. putida with the synthetic pentose phosphate pathway is a superior strain for FDCA and violacein production)	Corbion
	Escherichia coli	DH5α	E. coli DH5α with pSEVAb62-pTAC-hmfH	Cloning purposes (Section 4: P. putida with the synthetic pentose phosphate pathway is a superior strain for FDCA and violacein production)	This work
	Escherichia coli	DH5α	E. coli DH5α with pSEVAb62vioABCDE	Cloning purposes (Section 4: P. putida with the synthetic pentose phosphate pathway is a superior strain for FDCA and violacein production)	This work
	Escherichia coli	DH5α	E. coli DH5α with pGNW landing pad	Cloning purposes (Section 5: Library of RBS improves growth of the engineered P. putida strains while achieving high FDCA production)	This work
	Escherichia coli	DH5α	E. coli DH5α with pLGR-operon5 library	Cloning purposes (Section 5: Library of RBS improves growth of the engineered P. putida strains while achieving high FDCA production)	This work
	Pseudomonas putida	KT2440	P. putida Δgcd	Section 1: Rewiring the metabolism of P. putida towards the Pentose Phosphate Pathway	This work
	Pseudomonas putida	KT2440	P. putida ΔgcdΔedd	Section 1: Rewiring the metabolism of P. putida towards the Pentose Phosphate Pathway	This work
	Pseudomonas putida	KT2440	P. putida ΔgcdΔeddΔhexR	Section 1: Rewiring the metabolism of P. putida towards the Pentose Phosphate Pathway	This work
	Pseudomonas putida	KT2440	P. putida ΔgcdΔedd with p1P	Section 1: Rewiring the metabolism of P. putida towards the Pentose Phosphate Pathway	This work
	Pseudomonas putida	KT2440	P. putida ΔgcdΔedd with p2P	Section 1: Rewiring the metabolism of P. putida towards the Pentose Phosphate Pathway	This work
	Pseudomonas putida	KT2440	P. putida ΔgcdΔedd with p3P	Section 1: Rewiring the metabolism of P. putida towards the Pentose Phosphate Pathway	This work
	Pseudomonas putida	KT2440	P. putida ΔgcdΔedd with p4P	Section 1: Rewiring the metabolism of P. putida towards the Pentose Phosphate Pathway	This work
	Pseudomonas putida	KT2440	P. putida ΔgcdΔedd with p5P	Section 1: Rewiring the metabolism of P. putida towards the Pentose Phosphate Pathway	This work
	Pseudomonas putida	KT2440	P. putida ΔgcdΔedd with p6P	Section 1: Rewiring the metabolism of P. putida towards the Pentose Phosphate Pathway	This work
	Pseudomonas putida	KT2440	P. putida ΔgcdΔedd with p7P	Section 1: Rewiring the metabolism of P. putida towards the Pentose Phosphate Pathway	This work
	Pseudomonas putida	KT2440	P. putida ΔgcdΔedd with p8P	Section 1: Rewiring the metabolism of P. putida towards the Pentose Phosphate Pathway	This work
	Pseudomonas putida	KT2440	P. putida ΔgcdΔedd with p9P	Section 1: Rewiring the metabolism of P. putida towards the Pentose Phosphate Pathway	This work
	Pseudomonas putida	KT2440	P. putida ΔgcdΔedd with p10P	Section 1: Rewiring the metabolism of P. putida towards the Pentose Phosphate Pathway	This work
	Pseudomonas putida	KT2440	P. putida ΔgcdΔedd with p11P	Section 1: Rewiring the metabolism of P. putida towards the Pentose Phosphate Pathway	This work
	Pseudomonas putida	KT2440	P. putida ΔgcdΔedd with p1B	Section 1: Rewiring the metabolism of P. putida towards the Pentose Phosphate Pathway	This work
	Pseudomonas putida	KT2440	P. putida ΔgcdΔedd with p1E	Section 1: Rewiring the metabolism of P. putida towards the Pentose Phosphate Pathway	This work
	Pseudomonas putida	KT2440	P. putida ΔgcdΔedd with p2E	Section 1: Rewiring the metabolism of P. putida towards the Pentose Phosphate Pathway	This work
	Pseudomonas putida	KT2440	P. putida ΔgcdΔedd with p3E	Section 1: Rewiring the metabolism of P. putida towards the Pentose Phosphate Pathway	This work
	Pseudomonas putida	KT2440	P. putida ΔgcdΔedd with p4E	Section 1: Rewiring the metabolism of P. putida towards the Pentose Phosphate Pathway	This work
	Pseudomonas putida	KT2440	P. putida ΔgcdΔeddΔhexR with p1P	Section 1: Rewiring the metabolism of P. putida towards the Pentose Phosphate Pathway	This work
	Pseudomonas putida	KT2440	P. putida ΔgcdΔeddΔhexR with p2P	Section 1: Rewiring the metabolism of P. putida towards the Pentose Phosphate Pathway	This work
	Pseudomonas putida	KT2440	P. putida ΔgcdΔeddΔhexR with p3P	Section 1: Rewiring the metabolism of P. putida towards the Pentose Phosphate Pathway	This work
	Pseudomonas putida	KT2440	P. putida ΔgcdΔeddΔhexR with p4P	Section 1: Rewiring the metabolism of P. putida towards the Pentose Phosphate Pathway	This work
	Pseudomonas putida	KT2440	P. putida ΔgcdΔeddΔhexR with p5P	Section 1: Rewiring the metabolism of P. putida towards the Pentose Phosphate Pathway	This work
	Pseudomonas putida	KT2440	P. putida ΔgcdΔeddΔhexR with p6P	Section 1: Rewiring the metabolism of P. putida towards the Pentose Phosphate Pathway	This work
	Pseudomonas putida	KT2440	P. putida ΔgcdΔeddΔhexR with p7P	Section 1: Rewiring the metabolism of P. putida towards the Pentose Phosphate Pathway	This work
	Pseudomonas putida	KT2440	P. putida ΔgcdΔeddΔhexR with p8P	Section 1: Rewiring the metabolism of P. putida towards the Pentose Phosphate Pathway	This work
	Pseudomonas putida	KT2440	P. putida ΔgcdΔeddΔhexR with p9P	Section 1: Rewiring the metabolism of P. putida towards the Pentose Phosphate Pathway	This work
	Pseudomonas putida	KT2440	P. putida ΔgcdΔeddΔhexR with p10P	Section 1: Rewiring the metabolism of P. putida towards the Pentose Phosphate Pathway	This work
	Pseudomonas putida	KT2440	P. putida ΔgcdΔeddΔhexR with p11P	Section 1: Rewiring the metabolism of P. putida towards the Pentose Phosphate Pathway	This work
	Pseudomonas putida	KT2440	P. putida ΔgcdΔeddΔhexR with p1B	Section 1: Rewiring the metabolism of P. putida towards the Pentose Phosphate Pathway	This work
	Pseudomonas putida	KT2440	P. putida ΔgcdΔeddΔhexR with p1E	Section 1: Rewiring the metabolism of P. putida towards the Pentose Phosphate Pathway	This work
	Pseudomonas putida	KT2440	P. putida ΔgcdΔeddΔhexR with p2E	Section 1: Rewiring the metabolism of P. putida towards the Pentose Phosphate Pathway	This work
	Pseudomonas putida	KT2440	P. putida ΔgcdΔeddΔhexR with p3E	Section 1: Rewiring the metabolism of P. putida towards the Pentose Phosphate Pathway	This work
	Pseudomonas putida	KT2440	P. putida ΔgcdΔeddΔhexR with p4E	Section 1: Rewiring the metabolism of P. putida towards the Pentose Phosphate Pathway	This work
	Pseudomonas putida	KT2440	P. putida ΔgcdΔeddΔhexR with p7P and pSEVAb62-mBFP	Section 2: Elevated NADPH Levels in P. putida ΔgcdΔeddΔhexR strains through PP Pathway Redirection	This work
	Pseudomonas putida	KT2440	P. putida ΔgcdΔeddΔhexR with p4E and pSEVAb62-mBFP	Section 2: Elevated NADPH Levels in P. putida ΔgcdΔeddΔhexR strains through PP Pathway Redirection	This work
	Pseudomonas putida	KT2440	P. putida with pEB and pSEVAb62-mBFP	Section 2: Elevated NADPH Levels in P. putida ΔgcdΔeddΔhexR strains through PP Pathway Redirection	This work
	Pseudomonas putida	KT2440	P. putida ΔgapAΔgapB	Section 3: In vitro essays revealed that P. putida produces NADPH in the conversion of G3P to 3PG	This work
	Pseudomonas putida	KT2440	P. putida ΔPP_3443ΔPP_0665	Section 3: In vitro essays revealed that P. putida produces NADPH in the conversion of G3P to 3PG	This work
	Pseudomonas putida	KT2440	P. putida ΔgapA	Section 3: In vitro essays revealed that P. putida produces NADPH in the conversion of G3P to 3PG	This work
	Pseudomonas putida	KT2440	P. putida ΔgapB	Section 3: In vitro essays revealed that P. putida produces NADPH in the conversion of G3P to 3PG	This work
	Pseudomonas putida	KT2440	P. putida ΔPP_3443	Section 3: In vitro essays revealed that P. putida produces NADPH in the conversion of G3P to 3PG	This work
	Pseudomonas putida	KT2440	P. putida ΔPP_0665	Section 3: In vitro essays revealed that P. putida produces NADPH in the conversion of G3P to 3PG	This work
	Pseudomonas putida	KT2440	P. putida ΔgcdΔeddΔhexR with p7P and pSEVAb62-pTAC-hmfH	Section 4: P. putida with the synthetic pentose phosphate pathway is a superior strain for FDCA and violacein production & Section 6: Scale-up experiments in bioreactors showed the benefit of the engineered strains for improving FDCA production	This work
	Pseudomonas putida	KT2440	P. putida ΔgcdΔeddΔhexR with p4E and pSEVAb62-pTAC-hmfH	Section 4: P. putida with the synthetic pentose phosphate pathway is a superior strain for FDCA and violacein production & Section 6: Scale-up experiments in bioreactors showed the benefit of the engineered strains for improving FDCA production	This work
	Pseudomonas putida	KT2440	P. putida with pEB and pSEVAb62-pTAC-hmfH	Section 4: P. putida with the synthetic pentose phosphate pathway is a superior strain for FDCA and violacein production & Section 6: Scale-up experiments in bioreactors showed the benefit of the engineered strains for improving FDCA production	This work
	Pseudomonas putida	KT2440	P. putida ΔgcdΔeddΔhexR with p7P and pSEVAb22vioABCDE	Section 4: P. putida with the synthetic pentose phosphate pathway is a superior strain for FDCA and violacein production	This work
	Pseudomonas putida	KT2440	P. putida ΔgcdΔeddΔhexR with p4E and pSEVAb22vioABCDE	Section 4: P. putida with the synthetic pentose phosphate pathway is a superior strain for FDCA and violacein production	This work
	Pseudomonas putida	KT2440	P. putida with pEB and pSEVAb22vioABCDE	Section 4: P. putida with the synthetic pentose phosphate pathway is a superior strain for FDCA and violacein production	This work
	Pseudomonas putida	KT2440	NEM1 with optimized RBS for gntZ, rpe and xfpk genes integrated in the genome	Section 5: Library of RBS improves growth of the engineered P. putida strains while achieving high FDCA production	This work
	Pseudomonas putida	KT2440	NEM2 with optimized RBS for gntZ, rpe and xfpk genes integrated in the genome	Section 5: Library of RBS improves growth of the engineered P. putida strains while achieving high FDCA production	This work
	Pseudomonas putida	KT2440	NEM3 with optimized RBS for gntZ, rpe and xfpk genes integrated in the genome	Section 5: Library of RBS improves growth of the engineered P. putida strains while achieving high FDCA production	This work
	Pseudomonas putida	KT2440	NEM4 with optimized RBS for gntZ, rpe and xfpk genes integrated in the genome	Section 5: Library of RBS improves growth of the engineered P. putida strains while achieving high FDCA production	This work
	Pseudomonas putida	KT2440	NEM1 with pSEVAb62-pTAC-hmfH	Section 5: Library of RBS improves growth of the engineered P. putida strains while achieving high FDCA production & Section 6: Scale-up experiments in bioreactors showed the benefit of the engineered strains for improving FDCA production	This work
	Pseudomonas putida	KT2440	NEM2 with pSEVAb62-pTAC-hmfH	Section 5: Library of RBS improves growth of the engineered P. putida strains while achieving high FDCA production	This work
	Pseudomonas putida	KT2440	NEM3 with pSEVAb62-pTAC-hmfH	Section 5: Library of RBS improves growth of the engineered P. putida strains while achieving high FDCA production	This work
	Pseudomonas putida	KT2440	NEM4 with pSEVAb62-pTAC-hmfH	Section 5: Library of RBS improves growth of the engineered P. putida strains while achieving high FDCA production	This work
	Pseudomonas putida	KT2440	pSEVAb62-pTAC-hmfH	Section 5: Library of RBS improves growth of the engineered P. putida strains while achieving high FDCA production & Section 6: Scale-up experiments in bioreactors showed the benefit of the engineered strains for improving FDCA production	This work

## Sheet: Table S2
	Plasmid name	Genes	Origin	Source
	p1P	gntZ	P. putida KT2440	In-house strain
	p2P	zwf-1	P. putida KT2440	In-house strain
	p3P	glk–pgl–gntZ	P. putida KT2440	This work
	p4P	glk–pgl–gntZ–gapA–gapB	P. putida KT2440	This work
	p5P	gapA–gapB	P. putida KT2440	This work
	p6P	tal–gapA–gapB	P. putida KT2440	This work
	p7P	tktA–tal–gapA–gapB	P. putida KT2440	This work
	p8P	rpe–tktA–tal	P. putida KT2440	This work
	p9P	rpe	P. putida KT2440	This work
	p10P	gntZ–rpe	P. putida KT2440	This work
	p11P	gntZ–rpe–xfpk	P. putida and B. breve	This work
	p1B	xfpk	B. breve	This work
	p1E	gntZ	E. coli	This work
	p2E	rpe	E. coli	This work
	p3E	gntZ–rpe	E. coli	This work
	p4E	gntZ–rpe–xfpk	E. coli and B. breve	This work
	pSEVAb62-mBFP	mBFP	Codon optimized for P. putida	This work
	pSEVAb62-pTAC-hmfH	hmfH	Cupriavidus basilensis HMF14	This work
	pSEVAb62-p100-vioABCDE	vioABCDE	Chromobacterium violaceum	This work
	pGNW-gcd	gcd	P. putida KT2440	This work
	pGNW-edd	edd	P. putida KT2440	This work
	pGNW-hexR	hexR	P. putida KT2440	This work
	pGNW-gapA	gapA	P. putida KT2440	This work
	pGNW-gapB	gapB	P. putida KT2440	This work
	pGNW-PP_3443	PP_3443	P. putida KT2440	This work
	pGNW-PP_0665	PP_0665	P. putida KT2440	This work
	pGNW landing pad	cre	-	This work
	pJT-hmfH	hmfH	Cupriavidus basilensis HMF14	This work
	pLGR-operon5 library	gntZ–rpe–xfpk	E. coli and B. breve	This work

## Sheet: Table S3
	Primer name	Primer sequence (5' -> 3')	Characteristics
	P_86	CTGGATTCTCACCAATAAAAAACG	pSEVAb23 insert amplification Fw
	P_87	TCTAGGGCGGCGGAT	pSEVAb23 insert amplification Rv
	Fw M13	GTAAAACGACGGCCAGT	pGNW TS amplification Fw
	Rv M13	CAGGAAACAGCTATGAC	pGNW TS amplification Rv
	Fw VF3	TTTCATTATGGTGAAAGTTGGAACC	pSB1C3 insert amplification Fw
	Rv VF3	CATGTTCTTTCCTGCGTTATCC	pSB1C3 insert amplification Rv
	P_691	CGCTAAGGATGATTTCTGGAATTCGCAGGCCGCTTGGTCTCAACTAGAGAAAGAGGA	Forward primer amplifying a gene insert on the pSB1C plasmid including the RBS0034 overhang
	P_827	ACCTTGCCCTTTTTTGCCGGTCTCGACTGCAGCG	Reverse primer amplifying a gene insert on the pSB1C plasmid
	P_1022	GGTCTCCTAGTAGCTAGCACTGTACCTAGGACTGAGCTAGCCGTCAACTCTAGAAGC	Forward primer including a p100 promoter overhang amplifying the pSEVAb62 backbone
	P_760	AGGTCTCACAGTCCGGCAAAAAAGGG	Reverse primer for amplifying the pSEVAb62 backbone
	edd Fw	aacaccacgtcgatcgcctc	verification of edd KO
	edd Rv	tgccgccaatatcaccaacc	verification of edd KO
	gcd Fw	ctcaaggacagcaacggtcagcc	verification of gcd KO
	gcd Rv	tgaccagcgtgccgtactgc	verification of gcd KO
	M155 Fw hexR	CTGGCACCCTGGCAATC	verification of hexR KO
	M156 Rv hexR	GCCAAACAGGGCAAAGGTG	verification of hexR KO
	M159 pgl-Fw	tGGTCTCaGAATtcgcggccgcttctagATGGGAGGGCGTGGTATG	Primers used for the construction of plasmids carrying the different operons
	M160 pgl-Rv	aGGTCTCgactgcagcggccgctactagtattaTtATGGGCACCAGTAGATG	Primers used for the construction of plasmids carrying the different operons
	M161 gntZ-Fw	tGGTCTCaGAATtcgcggccgcttctagATGCAACTGGGAATCATCG	Primers used for the construction of plasmids carrying the different operons
	M162 gntZ-Rv	aGGTCTCgactgcagcggccgctactagtattaTtATTCGCCTTTCTTCTCGACGTG	Primers used for the construction of plasmids carrying the different operons
	M163 glk-Fw	tGGTCTCaGAATtcgcggccgcttctagATGAAGCACCTGCTGGTTGG	Primers used for the construction of plasmids carrying the different operons
	M164 glk-Rv	aGGTCTCgactgcagcggccgctactagtattaTtAGTGATCCAACGCCTGCTG	Primers used for the construction of plasmids carrying the different operons
	M165 rpe-Fw	tGGTCTCaGAATtcgcggccgcttctagATGCAGCCCTACGCTATTGC	Primers used for the construction of plasmids carrying the different operons
	M166 rpe-Rv	aGGTCTCgactgcagcggccgctactagtattaTtATGGGCGGGCCAGGG	Primers used for the construction of plasmids carrying the different operons
	M167 tktA-Fw	tGGTCTCaGAATtcgcggccgcttctagATGCCCAGCCGTCGTG	Primers used for the construction of plasmids carrying the different operons
	M168 tktA-Rv	aGGTCTCgactgcagcggccgctactagtattaTtAGTCTTCCAGCAGCTCTTCGGC	Primers used for the construction of plasmids carrying the different operons
	M169 tal-Fw	tGGTCTCaGAATtcgcggccgcttctagATGACCTCCAAGCTGGAACAAC	Primers used for the construction of plasmids carrying the different operons
	M170 tal-Rv	aGGTCTCgactgcagcggccgctactagtattaTtAGGCCTTTTCAGCTATCAACTTC	Primers used for the construction of plasmids carrying the different operons
	M171 gapA-Fw	tGGTCTCaGAATtcgcggccgcttctagATGACCCTTCGCATCGCC	Primers used for the construction of plasmids carrying the different operons
	M172 gapA-Rv	aGGTCTCgactgcagcggccgctactagtattaTtAGCCAGCCCGGTGCAG	Primers used for the construction of plasmids carrying the different operons
	M173 gapB-Fw	tGGTCTCaGAATtcgcggccgcttctagATGTGGAAGGTTCCCGTG	Primers used for the construction of plasmids carrying the different operons
	M174 gapB-Rv	aGGTCTCgactgcagcggccgctactagtattaTtAGCGTGGAAACGCTGGC	Primers used for the construction of plasmids carrying the different operons
	M195 Zwf ecoli Fw	tGGTCTCaGAATtcgcggccgcttctagATGGCGGTAACGCAAACAGCC	Primers used for the construction of plasmids carrying the different operons
	M196 Zwf ecoli Rv	aGGTCTCgactgcagcggccgctactagtattaTtACTCAAACTCATTCCAGGAACGACC	Primers used for the construction of plasmids carrying the different operons
	M197 pgl ecoli Fw	tGGTCTCaGAATtcgcggccgcttctagATGAAGCAAACAGTTTATATCGCC	Primers used for the construction of plasmids carrying the different operons
	M198 pgl ecoli Rv	aGGTCTCgactgcagcggccgctactagtattaTtAGTGTGCGTTAACCACCACC	Primers used for the construction of plasmids carrying the different operons
	M199 rpe ecoli Fw	tGGTCTCaGAATtcgcggccgcttctagATGAAACAGTATTTGATTGCCCCC	Primers used for the construction of plasmids carrying the different operons
	M200 rpe ecoli Rv	aGGTCTCgactgcagcggccgctactagtattaTtATTCATGACTTACCTTTGCCAG	Primers used for the construction of plasmids carrying the different operons
	M201 talA ecoli Fw	tGGTCTCaGAATtcgcggccgcttctagATGAACGAGTTAGACGGCATC	Primers used for the construction of plasmids carrying the different operons
	M202 talA ecoli Rv	aGGTCTCgactgcagcggccgctactagtattaTtATAGTTTGGCGGCAAGAAGATC	Primers used for the construction of plasmids carrying the different operons
	M203 talB ecoli Fw	tGGTCTCaGAATtcgcggccgcttctagATGACGGACAAATTGACCTCCC	Primers used for the construction of plasmids carrying the different operons
	M204 talB ecoli Rv	aGGTCTCgactgcagcggccgctactagtattaTtACAGCAGATCGCCGATCATTTTTTCC	Primers used for the construction of plasmids carrying the different operons
	M205 glk ecoli Fw	tGGTCTCaGAATtcgcggccgcttctagATGACAAAGTATGCATTAGTCGG	Primers used for the construction of plasmids carrying the different operons
	M206 glk ecoli Rv	aGGTCTCgactgcagcggccgctactagtattaTtACAGAATGTGACCTAAGGTCTGG	Primers used for the construction of plasmids carrying the different operons
	M207 gnd ecoli Fw	tGGTCTCaGAATtcgcggccgcttctagATGTCCAAGCAACAGATCGGC	Primers used for the construction of plasmids carrying the different operons
	M208 gnd ecoli Rv	aGGTCTCgactgcagcggccgctactagtattaTtAATCCAGCCATTCGGTATGGAAC	Primers used for the construction of plasmids carrying the different operons
	M209 gapA ecoli Fw	tGGTCTCaGAATtcgcggccgcttctagATGACTATCAAAGTAGGTATCAACGG	Primers used for the construction of plasmids carrying the different operons
	M210 gapA ecoli Rv	aGGTCTCgactgcagcggccgctactagtattaTtATTTGGAGATGTGAGCGATCAGG	Primers used for the construction of plasmids carrying the different operons
	M211 tktA ecoli Fw	tGGTCTCaGAATtcgcggccgcttctagATGTCCTCACGTAAAGAGCTTGC	Primers used for the construction of plasmids carrying the different operons
	M212 tktA ecoli Rv	aGGTCTCgactgcagcggccgctactagtattaTtACAGCAGTTCTTTTGCTTTCGC	Primers used for the construction of plasmids carrying the different operons
	M213 tktB ecoli Fw	tGGTCTCaGAATtcgcggccgcttctagATGTCCCGAAAAGACCTTGCC	Primers used for the construction of plasmids carrying the different operons
	M214 tktB ecoli Rv	aGGTCTCgactgcagcggccgctactagtattaTtAGGCACCTTTCACTCCCAGCAC	Primers used for the construction of plasmids carrying the different operons
	M193 zwf1-Fw	tGGTCTCaGAATtcgcggccgcttctagATGGCCGCAATCAGTGTC	Primers used for the construction of plasmids carrying the different operons
	M194 zwf1-Rv	aGGTCTCgactgcagcggccgctactagtattaTtAGATATCCCCATACCACG	Primers used for the construction of plasmids carrying the different operons
	M291 Fw TS1 PP_O665	aGGTCTCtcccgACTATGTGCTCACGCGC	Primers used for the construction of knockouts for the G3P-dehydrogenase activity essays
	M292Rv TS1 PP_O665	aGGTCTCtGAACGTTGCTCCTCAGGC	Primers used for the construction of knockouts for the G3P-dehydrogenase activity essays
	M293 Fw TS2 PP_0665	aGGTCTCtGTTCGGGGGAGGTTACCTCGATG	Primers used for the construction of knockouts for the G3P-dehydrogenase activity essays
	M294Rv TS2 PP_0665	aGGTCTCttcgacGAATGACACCGGGCAATTG	Primers used for the construction of knockouts for the G3P-dehydrogenase activity essays
	M295Fw TS1 PP_3443	aGGTCTCtcccgGGCGACAGGAGCTTGC	Primers used for the construction of knockouts for the G3P-dehydrogenase activity essays
	M296Rv TS1 PP_3443	aGGTCTCtATGGGTACTGCACCTCACATC	Primers used for the construction of knockouts for the G3P-dehydrogenase activity essays
	M297Fw TS2 PP_3443	aGGTCTCtCCATCCGCCGCGCTTATAGAC	Primers used for the construction of knockouts for the G3P-dehydrogenase activity essays
	M298Rv TS2 PP_3443	aGGTCTCttcgacCCAGATGTTGCCAAACGG	Primers used for the construction of knockouts for the G3P-dehydrogenase activity essays
	M309Fw TS2 gapA	aGGTCTCttgccCGCGACCCGTGTGGGAGC	Primers used for the construction of knockouts for the G3P-dehydrogenase activity essays
	M310Rv TS2 gapA	aGGTCTCttcgacCGACCAGCATGCGTGCCTG	Primers used for the construction of knockouts for the G3P-dehydrogenase activity essays
	M313Fw TS1 gapB	aGGTCTCtcccgGGTGATCGGCACCACGAG	Primers used for the construction of knockouts for the G3P-dehydrogenase activity essays
	M314Rv TS1 gapB	aGGTCTCtGTAGGGACAGAAAAAAGGGGCTAC	Primers used for the construction of knockouts for the G3P-dehydrogenase activity essays
	M315Fw TS2 gapB	aGGTCTCtCTACTTCGCTTGTAAGGCAATGA	Primers used for the construction of knockouts for the G3P-dehydrogenase activity essays
	M316Rv TS2 gapB	aGGTCTCttcgacCCATCGCTCTGCTCGG	Primers used for the construction of knockouts for the G3P-dehydrogenase activity essays
	M299Fw pp_3443 check	CCTGATTTCGTAGCGCAGGG	Forward knockout screening primer
	M300Rv pp_3443 check	CCTCTTTGTGGGTGGACACG	Reverse knockout screening primer
	M301Fw pp_0665 check	GCATTCTCAACGGTACCTC	Forward knockout screening primer
	M302Rv pp_0665 check	TATTCACAATGGTAGCGTGG	Reverse knockout screening primer
	M317M317 Fw gapB check	AGGCGGTGCAGGGCGG	Forward knockout screening primer
	M318M318 Rv gapB check	CAATGGCTCTACGGTGAGATCGAAAGC	Reverse knockout screening primer
	M323 Fw TS1 gapA	aGGTCTCtcccgGACAACATGTCGTTGTAGGCCG	Forward TS1 amplification for pGNW KO plasmid
	M324 Rv TS1 gapA	aGGTCTCtGGCAGTACCTCTGGCAGTTC	Reverse TS1 amplification for pGNW KO plasmid
	M337 Fw gapA check 2	CTTCGTCGGGCACGTCGTC	Forward knockout screening primer
	M338 Rv gapA check 2	AAGTAAGGCTGGTGGGCAGAC	Reverse knockout screening primer
	M452 Fw gapA removal	CAAAATGCCGTGCGACTCAG	Forward knockout screening primer for ΔgcdΔeddΔhexR
	M453 Rv gapA removal	CACTTCGTCGGGCACGTC	Reverse knockout screening primer for ΔgcdΔeddΔhexR
	M362 Fw hmfH 2	CGCAGCGAGTCAGTGAG	Forward hmfH gene checking primer
	M363 Rv hmfH 2	TCGCATGCTCCTCTAGACTC	Forward hmfH gene checking primer
	M454 Fw hmfH for meta bb with plac promoter	tGGTCTCaGAATtcgcggccgcttctagTCCCCATCCCCCTGTTG	Forward hmfH amplification including pTAC promoter on overhang for pSEVAb62 plasmid
	M455 Fw hmfH for pSB1C3 bb	tGGTCTCaGAATtcgcggccgcttctagATGGATACGCCGAGGGAG	Forward hmfH amplification for on pSB1C plasmid
	M456Rv hmfH for pSB1C3 and meta bb	aGGTCTCgactgcagcggccgctactagtattaTtAACTCGGATGGGCAACTTC	Reverse hmfH amplification for on pSB1C and pSEVAb62 plasmid
	M650	GGTCTCAACTAGAGAAAGAGGAGAAATACTAGATGAAACATTCTTCCGATATCTGCATTGTTGG	Forward primer for the amplification of the vioABCDE gene cluster
	M651	CCGGTCTCGACTGCAGCGTTAGCGCTTGGCCGCGA	Reverse primer for the amplification of the vioABCDE gene cluster
	M487 Fw gntZ RBS-library	aggtctcaactataaatttrwggdgvaattaatgtccaagcaacagatc	Primer to build the RBS library for p4E
	M488 Fw gntZ	atgtccaagcaacagatc	Primer to build the RBS library for p4E
	M489 Rv gntZ	aggtctcaattattaatccagccattcgg	Primer to build the RBS library for p4E
	M490 Fw rpe RBS-library	aggtctcataatatdaggadsmatataatgaaacagtatttgattgcc	Primer to build the RBS library for p4E
	M491 Rv rpe-1	aatattattcatgacttacctttgc	Primer to build the RBS library for p4E
	M492 Rv rpe-2	aggtctcaaatattattcatgacttacctttgc	Primer to build the RBS library for p4E
	M493 Fw xfpk RBS-library	aggtctcatattaagbrwgghattaatatgacgattgattgggaac	Primer to build the RBS library for p4E
	M494 Rv Xfpk-2	aggtctcaactgttactcgttgtcgcc	Primer to build the RBS library for p4E
	M495 Rv xfpk-1	ttactcgttgtcgcc	Primer to build the RBS library for p4E
	cusF-Fw	aGGTCTCtcccggacccaagggtcagtag	Forward primer to verify the genome integration of p4E
	cusF-Rv	aGGTCTCtagctagcactgtacctaggactgagctagccgtcaacagggcgattcagatc	Forward primer to verify the genome integration of p4E
	C398	aGGTCTCacagtGGGGTCCCCAATAATTACG	Forward primer for the amplification of the pLGR backbone with BsaI restriction site
	C397	aGGTCTCatagtTACCGTTCGTATAATGTATGCTATACg	Reverse primer for the amplification of the pLGR backbone with BsaI restriction site
	Gene name	Gene sequence (5' -> 3')
	mBFP codon optimized P. putida	ATGCAGAACTTGAACGGCAAGGTCGCTTTTGTGACGGGTGGGTCCCGCGGCATTGGTGCCGCAATCGTGCGTCGCTTGGCAGCGGACGGCGCTGACATTGCTTTCACGTACGTGTCGGCTTCCTCCAAAAATGTCGCGACGGCTCTGGTGCAGGAACTGGAGGCAAAAGGGCGGCGCGCTCGTGCCATTCAAGCAGACAGCGCAGACCCGGCTCAGGTGCGTCAGGCTGTCGAACAAGCAATCGTCCAGCTCGGGCCGGTCGACGTGCTCGTCAACAATGCAGGTATTTTCCTGGCCGGCCCGCTCGGGGAAGTGACCTTGGATGATTATGAGCGCACGATGAATATTAATGTGCGGGCGCCATTTGTGGCAATCCAAGCAGCTCAGGCGTCCATGCCC…
