# Supplementary material for: Strategic redesign of the central metabolism in Pseudomonas putida boosts NADPH generation and product formation
Source: Research Square preprint supplement (doi:10.21203/rs.3.rs-6821618/v1), 2025-06-18
Supplement: Supplementary file 1 [file fa7ae8cc239c1f7f80ffd821.pdf]

## Supplementary File 1

### Strategic redesign of the central metabolism in *Pseudomonas putida* for boosted NADPH generation and product formation

Maria Martin-Pascual<sup>1,5</sup>, Stijn Kral<sup>1</sup>, Adrian Garcia-Martinez<sup>1</sup>, Foppe van der Meulen<sup>1</sup>, Lissane Temming<sup>1</sup>, Jordy Mullink<sup>1</sup>, Lyon Bruinsma<sup>1,5</sup>, Sara Moreno-Paz<sup>1</sup>, Christos Batianis<sup>1,5</sup>, Enrique Asin-Garcia<sup>1,5</sup>, Luis Garcia-Morales<sup>1</sup>, Markus Jeschek<sup>6</sup>, Vitor A. P. Martins dos Santos<sup>4,5,\*</sup>, Richard van Kranenburg<sup>2,3,\*</sup>

<sup>1</sup> Laboratory of Systems and Synthetic Biology, Wageningen University & Research, Wageningen, 6708 WE, The Netherlands

<sup>2</sup> Corbion, Gorinchem, 4206 AC, The Netherlands

<sup>3</sup> Laboratory of Microbiology, Wageningen University & Research, Wageningen, 6708 WE, The Netherlands

<sup>4</sup> LifeGlimmer GmbH, Berlin, 12163, Germany

<sup>5</sup> Bioprocess Engineering Group, Wageningen University & Research, Wageningen, 6700 AA, The Netherlands

<sup>6</sup> Department of Biosystems Science and Engineering, ETH Zurich, Basel, Switzerland

\* Shared corresponding authors. Richard van Kranenburg; Email: [richard.van.kranenburg@corbion.com](mailto:richard.van.kranenburg@corbion.com) & Vitor A. P. Martins dos Santos; Tel: +31317482865; Email: [vitor.martinsdossantos@wur.nl](mailto:vitor.martinsdossantos@wur.nl)

#### Growth curves of *P. putida* WT, *P. putida* $\Delta gcd\Delta edd$ and *P. putida* $\Delta gcd\Delta edd\Delta hexR$

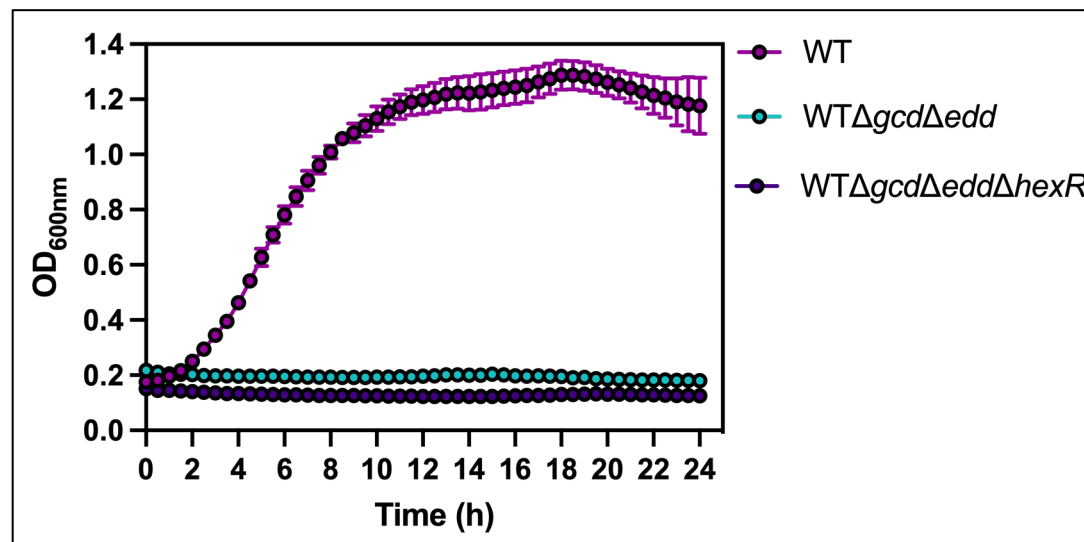

**Figure S1. Growth curves of *P. putida* WT, *WTΔgcdΔedd* and *WTΔgcdΔeddΔhexR*.** The OD of the strains grown on M9 minimal media supplemented with 70 mM of glucose was measured over 24 hours, at a wavelength of 600 nm (OD<sub>600nm</sub>) in a microplate reader. Values represent the mean and standard deviation of three biological replicates.

Growth curves of *P. putida* WT, *P. putida*  $\Delta gcd\Delta edd$  and *P. putida*  $\Delta gcd\Delta edd\Delta hexR$  with different plasmids

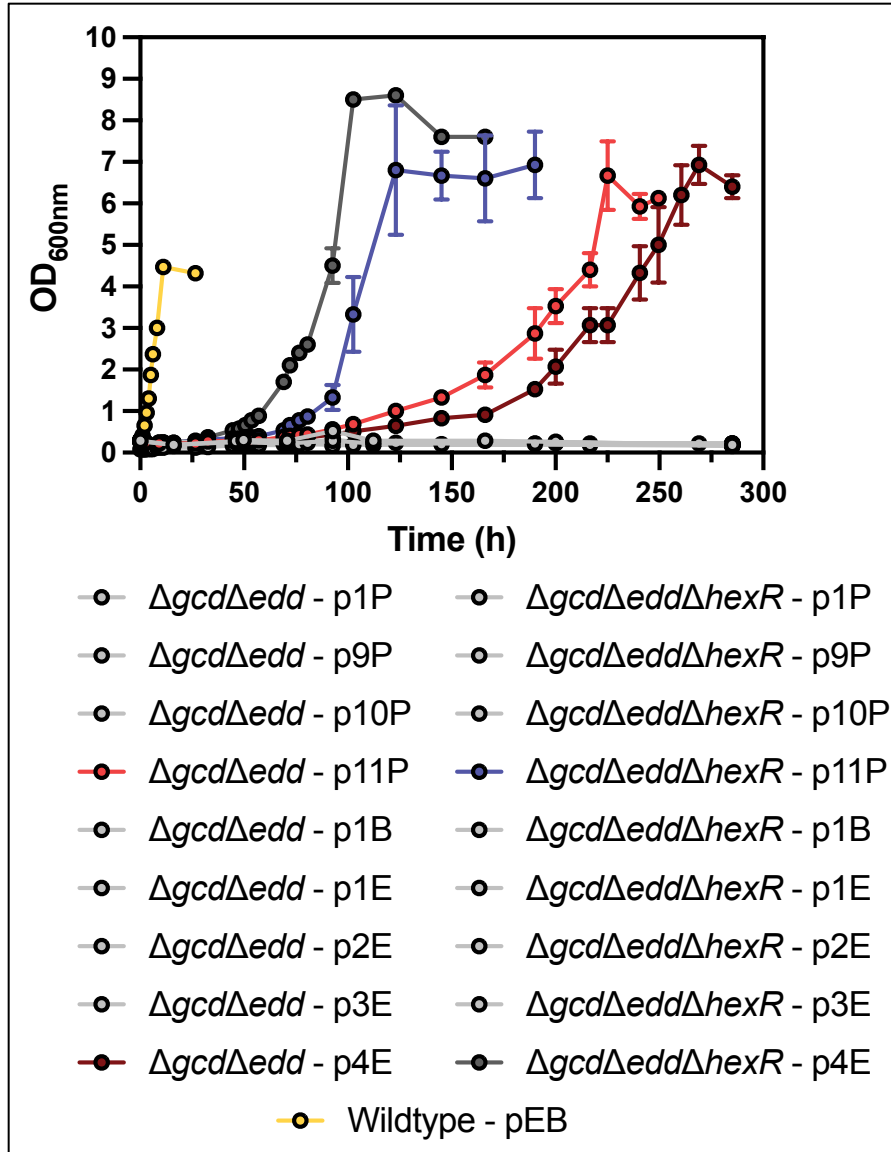

**Figure S2. Growth curves of *P. putida* WT, WT $\Delta gcd\Delta edd$  and WT $\Delta gcd\Delta edd\Delta hexR$  with different plasmids.** The OD of the strains grown on M9 minimal media supplemented with 70 mM of glucose was measured over 285 hours, at a wavelength of 600 nm ( $OD_{600nm}$ ) in a microplate reader. Values represent the mean and standard deviation of three biological replicates.

### Correlating the $OD_{600nm}$ with the cell dry weight

The cell dry weight (CDW) of *P. putida* WT and WT $\Delta gcd\Delta edd\Delta hexR$ \_p7P was determined. A linear correlation through the data points shows that the relation between the  $OD_{600nm}$  and CDW for *P. putida* WT is  $1: 0.52 \pm 0.007$  and for WT $\Delta gcd\Delta edd\Delta hexR$ \_p7P is  $1: 0.53 \pm 0.015$ , which are in line with the values obtained in previous experiments<sup>1</sup>. WT $\Delta gcd\Delta edd\Delta hexR$ \_p7P reaches higher  $OD_{600nm}$  values than *P. putida* WT. This study shows that the increased  $OD_{600nm}$  is due to increased cell mass, as *P. putida* WT and WT $\Delta gcd\Delta edd\Delta hexR$ \_p7P show no significant difference in their relationship between the CDW and the  $OD_{600nm}$ . WT $\Delta gcd\Delta edd\Delta hexR$ \_p7P produces more biomass than *P. putida* WT in the same media and under the same starting conditions.

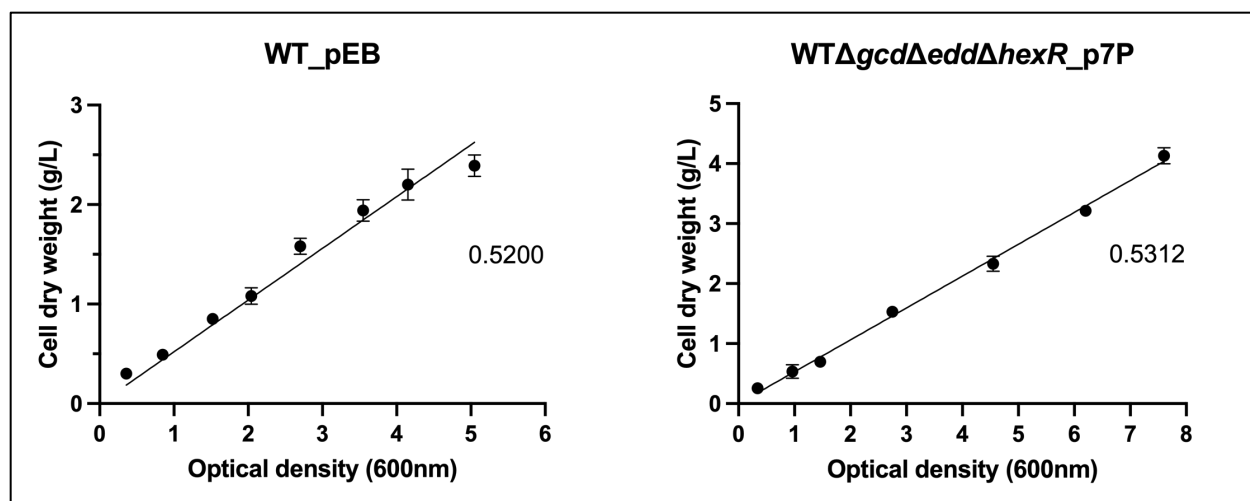

**Figure S3. Correlating the Cell dry weight (CDW) to the OD<sub>600nm</sub> in WT\_pEB and WTΔgcdΔeddΔhexR\_p7P.** The cell dry weight (g/L) of cultures was measured at different cell densities (OD<sub>600nm</sub>) for WT\_pEB and WTΔgcdΔeddΔhexR\_p7P. Values represent the mean and standard deviation of three replicates.

#### Characterizing the growth of WTΔgcdΔeddΔhexR strains in small 1-L bioreactors

A growth experiment with WT\_pEB, WTΔgcdΔeddΔhexR\_p4E and WTΔgcdΔeddΔhexR\_p7P in 1L-bioreactors was performed. The specific growth rate, maximum OD<sub>600nm</sub> value and biomass yield were determined (**Table S1**). The doubling time of WT\_pEB, WTΔgcdΔeddΔhexR\_p4E and WTΔgcdΔeddΔhexR\_p7P; 9.11 h ± 0.24, 13.0 8 h and 0.97 h ± 0.04 respectively, was lower than in the shake flask experiment being 15.2 h ± 0.92, 24.75 h and 2.0 h ± 0.12, respectively (**Table S1**). The maximal cell density reached was significantly higher for both mutant strains than WT\_pEB, consistent with previous growth experiments. Additionally, the yield of biomass on glucose ( $Y_{X/S}$ ) was determined (**Table S1**). The  $Y_{X/S}$  value of WT\_pEB ranged from 0.4 to 0.5 gCDW·g<sup>-1</sup>, corresponding to literature values of 0.47 gCDW·g<sup>-1</sup> ± 0.05<sup>2</sup>. The  $Y_{X/S}$  value of WTΔgcdΔeddΔhexR\_p4E was 0.43 gCDW·g<sup>-1</sup> and the  $Y_{X/S}$  value of WTΔgcdΔeddΔhexR\_p7P was 0.35 gCDW·g<sup>-1</sup>. These growth rates and  $Y_{X/S}$  values can be related with the metabolic flux of the strains. The lower growth rates and  $Y_{X/S}$  values of WTΔgcdΔeddΔhexR\_p7P was due to the higher carbon loss at the 6-phosphogluconate (6PG) to ribulose-5-phosphate (Ri5P) the reaction compared with the *P. putida* WT. WTΔgcdΔeddΔhexR\_p4E reduces the carbon loss at the node where the 6PG is converted into Ri5P by enabling the conversion from xylulose-5-phosphate (X5P) to glyceraldehyde-3-phosphate (G3P) and acetyl-phosphate (Acp), which can be directly degraded to acetyl-CoA. By reducing this carbon loss, the growth rate, and  $Y_{X/S}$  values of WTΔgcdΔeddΔhexR\_p4E are higher than WTΔgcdΔeddΔhexR\_p7P.

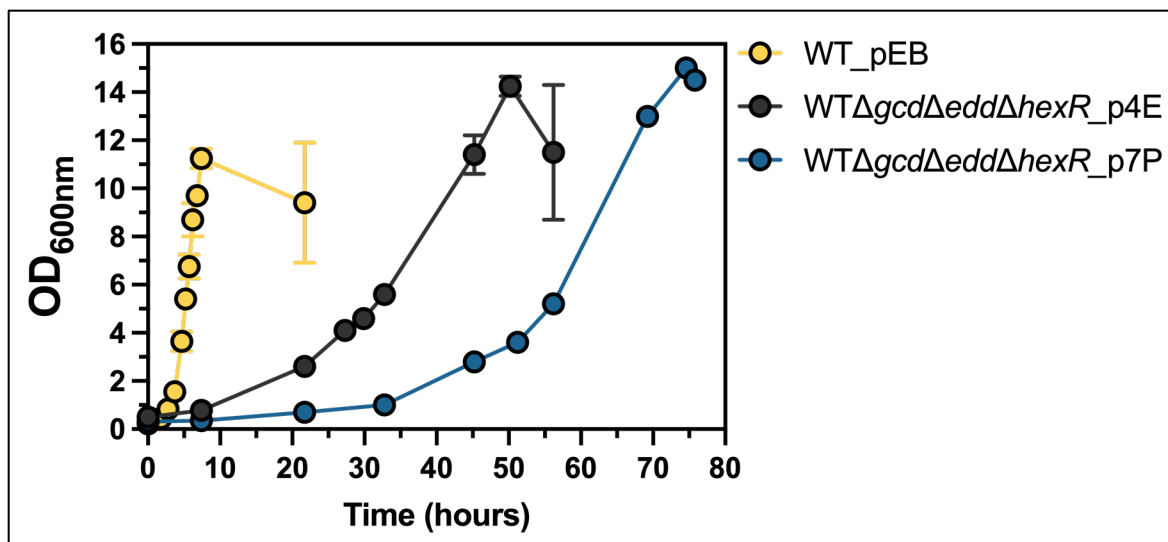

**Figure S4. Growth curves of WT\_pEB, WTΔgcdΔeddΔhexR\_p4E and WTΔgcdΔeddΔhexR\_p7P.** Strains were grown in 1L tabletop bioreactors containing 500 mL of M9 media with 100 mM glucose. Each point is the average of two duplicate reactors, except for WTΔgcdΔeddΔhexR\_p7P, which is based on only one reactor. The optical density was measured over 72 hours, at a wavelength of 600 nm (OD<sub>600nm</sub>).

#### Cell Preparation and Fluorescence Measurements

Overnight cultures were centrifuged at 4,000 rpm and 4°C for 8 minutes. Following centrifugation, the cell pellet was washed twice with Phosphate-Buffered Saline (PBS) and subsequently resuspended in PBS to an optical density at 600 nm (OD<sub>600nm</sub>) of 1.0. The cell suspension was then transferred to a 96-well black plate with clear bottoms. For cell permeabilization, 0.05% (w/v) CTAB (final concentration) was added, followed by a brief incubation at room temperature for 2 minutes. Different NADPH concentrations, ranging from 0.01 to 1 mM, were introduced to the CTAB-treated cells. The optical density and fluorescence of the samples were measured in a microplate reader (Synergy™ Mx by BioTek) using 96 wells plates in a total volume of 200 μL per well. The optical density was determined at 600 nm, while fluorescence readings were taken with an excitation wavelength of 395 nm and an emission wavelength of 451 nm. Based on the data acquired, a calibration curve correlating NADPH concentration to fluorescence intensity was constructed (**Figure S4**).

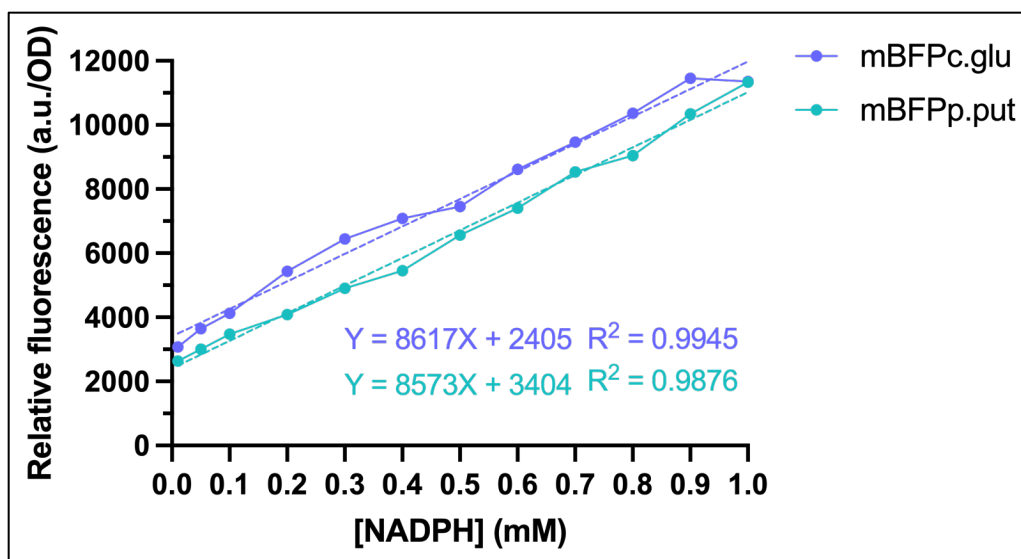

**Figure S5. Calibration curve of NADPH concentrations against relative fluorescence intensity.** Relative fluorescence intensities were plotted against different amounts of added NADPH concentrations to CTAB permeabilized *P. putida* cells. The NADPH-dependent blue fluorescent protein (mBFP) was used as biosensor ( $\lambda(\text{ex}) = 380 \text{ nm}$ ,  $\lambda(\text{em}) = 451 \text{ nm}$ ). The teal line represents data for mBFP codon optimized for *P. putida* (relationship given by  $Y = 8617X + 2405$  with  $R^2 = 0.9945$ ), while the purple line indicates mBFP codon optimized for *C. glutamicum* (relationship given by  $Y = 8573X + 3404$  with  $R^2 = 0.9876$ ). Each dot represents an individual *in vivo* fluorescence measurement divided the OD of the cells, which was measured at a wavelength of 600 nm.

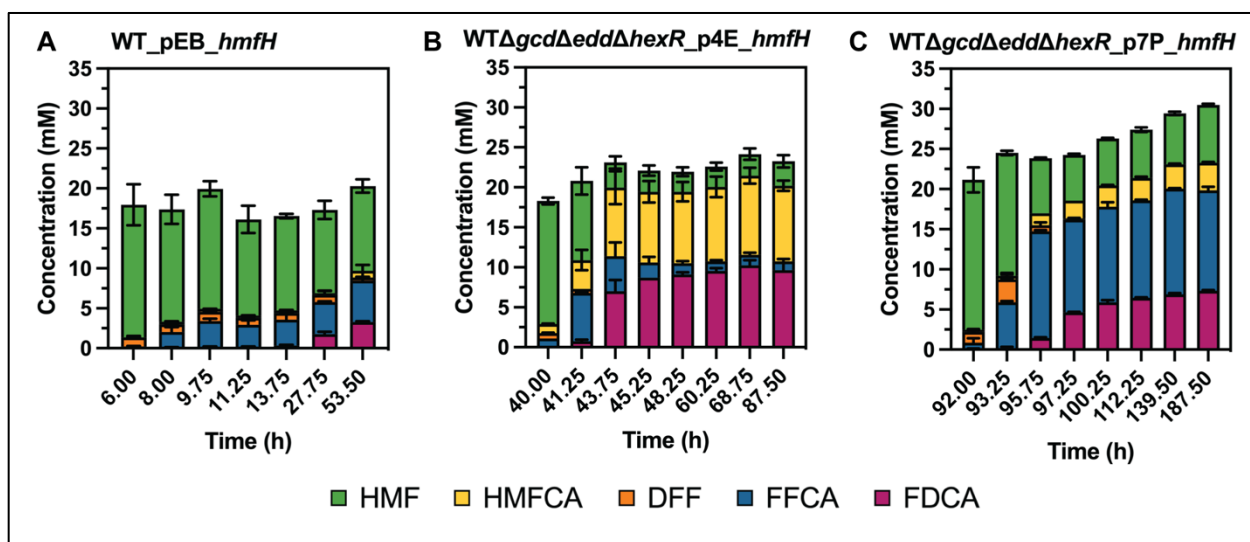

**Figure S6. FDCA production in 250 mL-shake flasks with 25 mL of M9 minimal media supplemented with glucose.** Graphical representation of the HMF conversion into FDCA and other reaction intermediates (HMFCFA, DFF, and FFCA) by **A)** WT\_pEB\_hmfH, **B)** WT $\Delta$ gcd $\Delta$ edd $\Delta$ hexR\_p4E\_hmfH and **C)** WT $\Delta$ gcd $\Delta$ edd $\Delta$ hexR\_p7P\_hmfH. The bars represent the average of three technical replicates, and error bars represent the standard deviation. Compounds in this figure are abbreviated as follows: 5-hydroxymethylfurfural (HMF), 5-hydroxymethyl-2-furancarboxylic acid (HMFCFA), 2,5-diformylfuran (DFF), 5-formyl-2-furancarboxylic acid (FFCA), and 2,5-furandicarboxylic acid (FDCA).

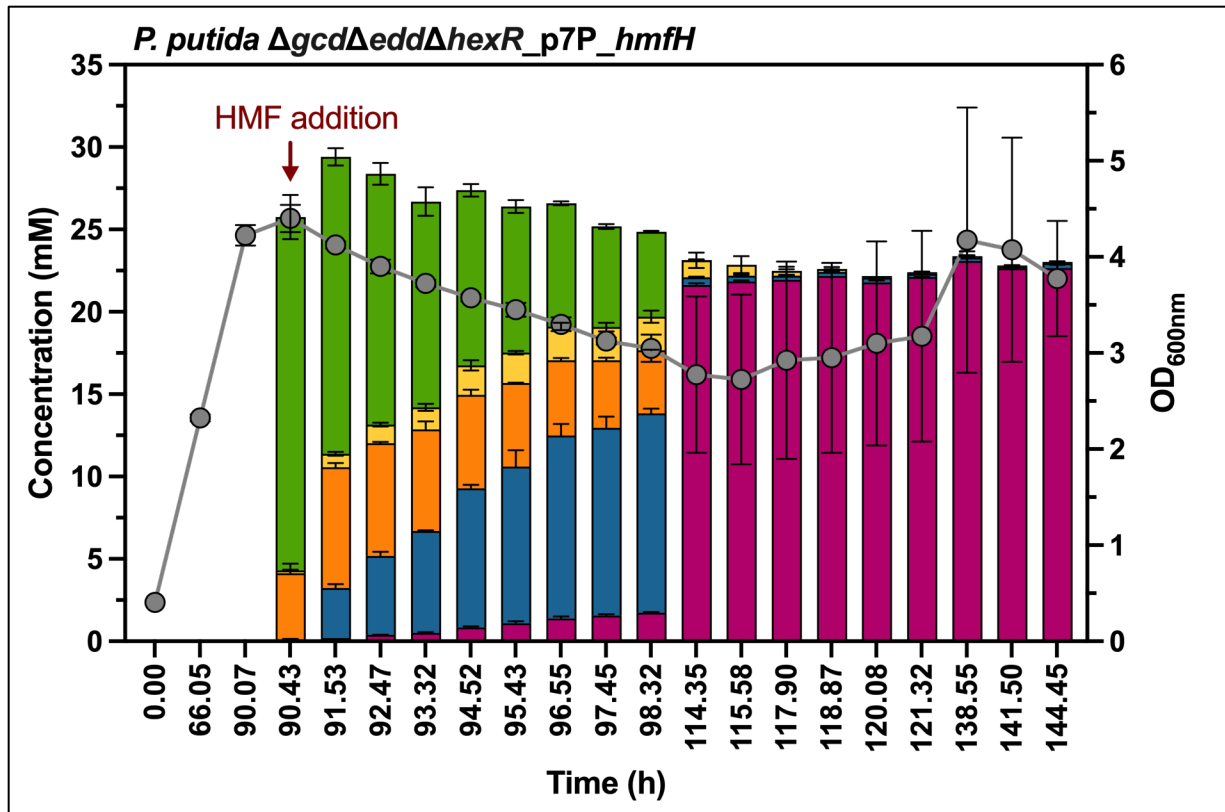

**Figure S7. FDCA production of WT $\Delta gcd\Delta edd\Delta hexR\_p7P\_hmfH$  in 1-L bioreactors.** Graphical representation of the growth and HMF conversion into FDCA and other reaction intermediates (HMFCFA, DFF, and FFCA) by WT $\Delta gcd\Delta edd\Delta hexR\_p7P\_hmfH$ . The red arrow represents the addition of 25 mM HMF. Data points (OD<sub>600nm</sub>) and bars (HMF, HMFCFA, DFF, FFCA, and FDCA concentrations) represent the average of two technical replicates, and error bars represent the standard deviation. Compounds in this figure are abbreviated as follows: 5-hydroxymethylfurfural (HMF), 5-hydroxymethyl-2-furancarboxylic acid (HMFCFA), 2,5-diformylfuran (DFF), 5-formyl-2-furancarboxylic acid (FFCA), and 2,5-furandicarboxylic acid (FDCA).

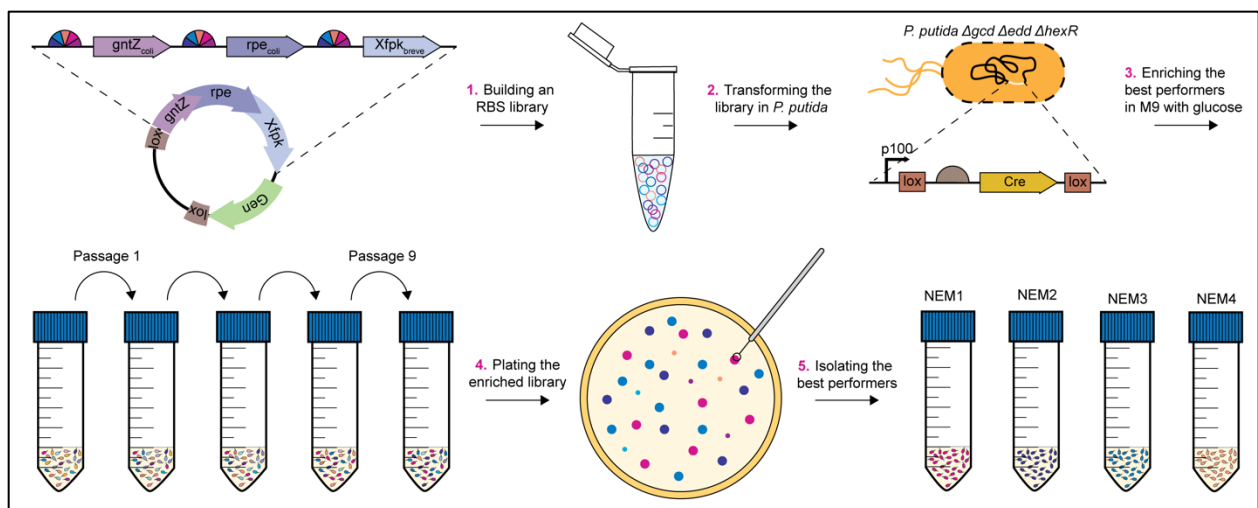

**Figure S8. Workflow to build a library of RBS sequences for *gntZ*, *rpe* and *xfpk* genes using the CRE-like recombination method<sup>3</sup>.** Step 1: we first amplified each gene using forward primers that included a Ribosome Binding Site (RBS) with degenerative nucleotides, creating a library of the *gntZ*-*rpe*-*xfpk* genes.

All genes and a non-replicative backbone were ligated using Golden Gate. As result, an operon library with *gntZ-rpe-xfpk* genes carrying all predicted RBS combinations was constructed. Step 2: The library was electroporated in *P. putida*  $\Delta gcd\Delta edd\Delta hexR$  with a Cre-lox cassette integrated into its genome. The Cre-lox cassette comprised the *cre* gene flanked by two lox sites (*lox71* and *lox2/66*), with a constitutive promoter BBa\_J23100 upstream of *lox71* and a T7 transcriptional terminator downstream of *lox2/66*. Step 3: *P. putida*  $\Delta gcd\Delta edd\Delta hexR$  with the *gntZ-rpe-xfpk* operon library was grown in 50-mL falcon tubes, containing 10 mL M9 minimal media supplemented with 70 mM of glucose and gentamycin. A total of 10 passages were performed. Step 4: The liquid culture from passage 10 was plated in agar M9 minimal media supplemented with 70 mM of glucose and gentamycin to isolate individual colonies. Step 5: The largest colonies were selected and grown in 50-mL falcon tubes, containing 10 mL M9 minimal media supplemented with 70 mM of glucose and gentamycin.

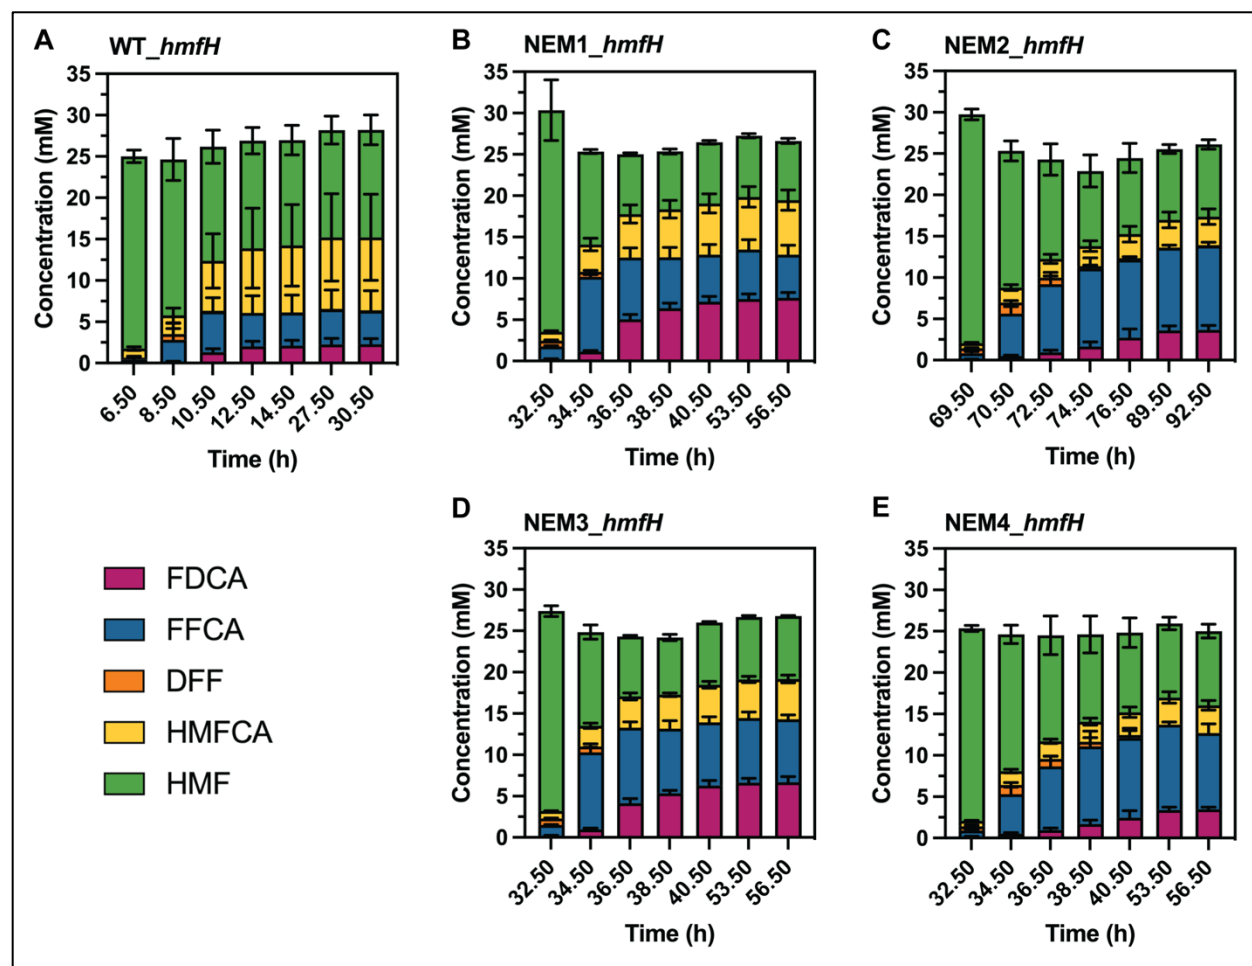

**Figure S9. FDCA production in 250 mL-shake flasks with 25 mL of M9 minimal media supplemented with glucose.** Graphical representation of the HMF conversion into FDCA and other reaction intermediates (HMFCFA, DFF, and FFCA) by **A) WT\_hmfH**, **B) NEM1\_hmfH**, **C) NEM2\_hmfH**, **D) NEM3\_hmfH** and **E) NEM4\_hmfH**. The bars represent the average of three technical replicates, and error bars represent the standard deviation. Compounds in this figure are abbreviated as follows: 5-hydroxymethylfurfural (HMF), 5-hydroxymethyl-2-furancarboxylic acid (HMFCFA), 2,5-diformylfuran (DFF), 5-formyl-2-furancarboxylic acid (FFCA), and 2,5-furandicarboxylic acid (FDCA).

**Table S1. Growth characterization of *P. putida*  $\Delta gcd\Delta edd$  and *P. putida*  $\Delta gcd\Delta edd\Delta hexR$  strains**

| Strain                                    | $\mu$ (h <sup>-1</sup> ) | Doubling time (h) | Max OD <sub>600nm</sub> | Y <sub>X/S</sub> (g <sub>CDW</sub> ·g <sub>glucose</sub> ) | Experiment             |
|-------------------------------------------|--------------------------|-------------------|-------------------------|------------------------------------------------------------|------------------------|
| WT_pEB                                    | 0.3233                   | 2.17 (±0.04)      | 5 (±0.4)                | -                                                          | Figure 1C (Flask)      |
| WT $\Delta gcd\Delta edd\Delta hexR$ _p4E | 0.0619                   | 11.19 (±0.24)     | 7 (±0.4)                | -                                                          | Figure 1C (Flask)      |
| WT $\Delta gcd\Delta edd\Delta hexR$ _p7P | 0.0286                   | 24.75 (±0.80)     | 6.8 (±0.12)             | -                                                          | Figure 1C (Flask)      |
| WT_pEB                                    | 0.348                    | 2 (±0.12)         | 4.47 (±0.12)            | 0.56 (±0.12)                                               | Figure 1F (Flask)      |
| $\Delta gcd\Delta edd$ – p4E              | 0.019                    | 36.7 (±0.98)      | 6.93 (±0.46)            | 0.34 (±0.04)                                               | Figure 1F (Flask)      |
| $\Delta gcd\Delta edd$ – p11P             | 0.015                    | 45.9 (±1.43)      | 6.67 (±0.83)            | 0.32 (±0.04)                                               | Figure 1F (Flask)      |
| $\Delta gcd\Delta edd\Delta hexR$ – p4E   | 0.045                    | 15.6 (±0.44)      | 8.6 (±0.14)             | 0.50 (±0.10)                                               | Figure 1F (Flask)      |
| $\Delta gcd\Delta edd\Delta hexR$ – p11P  | 0.046                    | 15.2 (±0.92)      | 6.93 (±0.81)            | 0.39 (±0.02)                                               | Figure 1F (Flask)      |
| WT_pEB                                    | 0.71                     | 0.97 (±0.04)      | 11.5                    | 0.48                                                       | Figure S3 (Bioreactor) |
| WT $\Delta gcd\Delta edd\Delta hexR$ _p4E | 0.076                    | 9.11 (±0.24)      | 14                      | 0.43                                                       | Figure S3 (Bioreactor) |
| WT $\Delta gcd\Delta edd\Delta hexR$ _p7P | 0.053                    | 13.08             | 13                      | 0.35                                                       | Figure S3 (Bioreactor) |
| WT $\Delta gcd\Delta edd\Delta hexR$ _p4E | 0.05 (±0.001)            | 13.79 (±0.15)     | 7.27 (±0.31)            | 0.49 (±0.03)                                               | Figure 5C (Flask)      |
| NEM1                                      | 0.07 (±0.007)            | 9.53 (±0.90)      | 6.47 (±0.12)            | 0.59 (±0.08)                                               | Figure 5C (Flask)      |
| NEM2                                      | 0.04 (±0.003)            | 16.38 (±1.34)     | 6.27 (±0.46)            | 0.41 (±0.06)                                               | Figure 5C (Flask)      |
| NEM3                                      | 0.07 (±0.005)            | 9.65 (±0.65)      | 6.07 (±0.46)            | 0.52 (±0.05)                                               | Figure 5C (Flask)      |
| NEM4                                      | 0.08 (±0.002)            | 9.18 (±0.27)      | 5.47 (±0.42)            | 0.47 (±0.06)                                               | Figure 5C (Flask)      |

**Table S2. NADPH analysis in the engineered *P. putida* strains using mBFP *in vivo* sensor**

|                         | OD range  | <i>P. putida</i><br>Ctrl_mBFP | SD       | <i>P. putida</i><br>$\Delta gcd\Delta edd\Delta$<br><i>hexR_p7P</i><br>mBFP | SD       | <i>P. putida</i><br>$\Delta gcd\Delta edd\Delta$<br><i>hexR_p4E</i><br>mBFP | SD       |
|-------------------------|-----------|-------------------------------|----------|-----------------------------------------------------------------------------|----------|-----------------------------------------------------------------------------|----------|
| Lag phase               | 0.10-0.14 | 41200                         | 1456.907 | 222000                                                                      | 38560    | 276000                                                                      | 10481.76 |
|                         | 0.24-0.32 | 42900                         | 621.2807 | 659000                                                                      | 59396    | 376000                                                                      | 3717.221 |
| Early exponential phase | 0.44-0.47 | 43800                         | 2785.087 | 572000                                                                      | 130053.1 | 382000                                                                      | 5201.577 |
|                         | 0.57-0.60 | 47400                         | 1873.005 | 575000                                                                      | 161336.4 | 392000                                                                      | 2669.375 |
| Late exponential phase  | 0.76-0.79 | 50600                         | 1961.916 | 460000                                                                      | 158311.2 | 373000                                                                      | 21615    |
|                         | 0.90-1.00 | 59400                         | 2044.19  | 379000                                                                      | 151980.2 | 378000                                                                      | 5835.139 |
|                         | 1.38-1.42 | 52700                         | 1414.368 | 326000                                                                      | 90265.16 | 359000                                                                      | 9986.045 |
| Stationary phase        | 1.52-1.60 | 60500                         | 6939.505 | 310000                                                                      | 36855.4  | 343000                                                                      | 7257.685 |

**Table S2. Growth rate and doubling time of *P. putida* strains containing one or more active GAPDH enzymes.**

| Strain                                      | Active GAPDH                    | $\mu$ (h <sup>-1</sup> ) | Doubling time (h <sup>-1</sup> ) | Experiment |
|---------------------------------------------|---------------------------------|--------------------------|----------------------------------|------------|
| Wild type                                   | GAPA, GAPB, PP_3443 and PP_0665 | 0.43 ±0.04               | 1.62 ±0.12                       | Figure 3B  |
| $\Delta PP\_3443\Delta PP\_0665$            | GAPA and GAPB                   | 0.36 ±0.02               | 1.92 ±0.09                       | Figure 3B  |
| $\Delta gapA\Delta gapB$                    | PP_3443 and PP_0665             | 0.38 ±0.05               | 1.82 ±0.12                       | Figure 3B  |
| $\Delta PP\_3443\Delta PP\_0665\Delta gapB$ | GAPA                            | 0.41 ±0.04               | 1.70 ±0.10                       | Figure 3B  |
| $\Delta PP\_3443\Delta PP\_0665\Delta gapA$ | GAPB                            | 0.12 ±0.02               | 5.98 ±0.21                       | Figure 3B  |
| $\Delta gapA\Delta gapB\Delta PP\_0665$     | PP_3443                         | 0.38 ±0.03               | 1.81 ±0.08                       | Figure 3B  |
| $\Delta gapA\Delta gapB\Delta PP\_3443$     | PP_0665                         | 0.14 ±0.01               | 4.86 ±0.17                       | Figure 3B  |

**Table S3: Overview of the gene composition of the plasmids. All plasmids have a pSEVAb23 backbone.**

| Plasmid name | Genes                         | Organism                |
|--------------|-------------------------------|-------------------------|
| p1P          | <i>gntZ</i>                   | <i>P. putida</i> KT2440 |
| p2P          | <i>zwf-1</i>                  | <i>P. putida</i> KT2440 |
| p3P          | <i>glk-pgl-gntZ</i>           | <i>P. putida</i> KT2440 |
| p4P          | <i>glk-pgl-gntZ-gapA-gapB</i> | <i>P. putida</i> KT2440 |
| p5P          | <i>gapA-gapB</i>              | <i>P. putida</i> KT2440 |
| p6P          | <i>tal-gapA-gapB</i>          | <i>P. putida</i> KT2440 |



|                        |                           |                                      |
|------------------------|---------------------------|--------------------------------------|
| p7P                    | <i>tktA-tal-gapA-gapB</i> | <i>P. putida</i> KT2440              |
| p8P                    | <i>rpe-tktA-tal</i>       | <i>P. putida</i> KT2440              |
| p9P                    | <i>rpe</i>                | <i>P. putida</i> KT2440              |
| p10P                   | <i>gntZ-rpe</i>           | <i>P. putida</i> KT2440              |
| p11P                   | <i>gntZ-rpe-xfpk</i>      | <i>P. putida</i> and <i>B. breve</i> |
| p1B                    | <i>xfpk</i>               | <i>B. breve</i>                      |
| p1E                    | <i>gntZ</i>               | <i>E. coli</i>                       |
| p2E                    | <i>rpe</i>                | <i>E. coli</i>                       |
| p3E                    | <i>gntZ-rpe</i>           | <i>E. coli</i>                       |
| p4E                    | <i>gntZ-rpe-xfpk</i>      | <i>E. coli</i> and <i>B. breve</i>   |
| pSEVAb62-mBFP          | <i>mBFP</i>               | Codon optimized for <i>P. putida</i> |
| pSEVAb62-pTAC-hmfH     | <i>hmfH</i>               | <i>Cupriavidus basilensis</i> HMF14  |
| pSEVAb62-p100-vioABCDE | <i>vioABCDE</i>           | <i>Chromobacterium violaceum</i>     |

**Table S4. RBS sequence variants.** RBS sequences present in the most optimal strains obtained from the RBS library. The corresponding translation initiation rate of each RBS was predicted using the RBS calculator tool by Salis et al. (2009)<sup>4</sup>.

| Strain              | Gene        | Sequence          | Predicted translation initiation rate |
|---------------------|-------------|-------------------|---------------------------------------|
| NEM1                | <i>gntZ</i> | AATTTGAGGAGGAATTA | 791.72                                |
|                     | <i>rpe</i>  | ATATGAGGATGAATATA | 42.11                                 |
|                     | <i>xfpk</i> | TTAAGTGAGGCATTAAT | 111.26                                |
| NEM2                | <i>gntZ</i> | AATTTAAGGAGGAATTA | 1576.2                                |
|                     | <i>rpe</i>  | ATATAAGGAGGAATATA | 646.81                                |
|                     | <i>xfpk</i> | TTAAGTAAGGTATTAAT | 160.3                                 |
| NEM3                | <i>gntZ</i> | AATTTGAGGAGGAATTA | 791.72                                |
|                     | <i>rpe</i>  | ATATTAGGAGGAATATA | 314.81                                |
|                     | <i>xfpk</i> | TTAAGTAAGGCATTAAT | 118.57                                |
| NEM4                | <i>gntZ</i> | AATTTGAGGGGGAATTA | 350.59                                |
|                     | <i>rpe</i>  | ATATGAGGAACCATATA | 22.33                                 |
|                     | <i>xfpk</i> | TTAAGGGAGGAATTAT  | 597.85                                |
| WTΔgcdΔeddΔhexR_p4E | <i>gntZ</i> | AAAGAGGAGAAA      | 84.36                                 |
|                     | <i>rpe</i>  | AAAGAGGAGAAA      | 16.25                                 |
|                     | <i>xfpk</i> | AAAGAGGAGAAA      | 156.28                                |

## Data analysis S1

Growth rates ( $\mu$ ) were calculated by plotting the OD<sub>600nm</sub> data in a logarithmic scale. Next, the trendline of the exponential phase was added to obtain the equation of the curve in the form of  $y=Ae^{Bx}$ , where x is equal to  $\mu$ .

**Equation 1:** Doubling time =  $\frac{\ln(2)}{\mu}$  [h]

**Equation 2:**  $CDW_{(t)} = OD_{600(t)} * OD_{CDW} \text{ factor } [g_{DCW} * L^{-1}]$

**Equation 3:**  $Y_X = \frac{CDW_{(max)}}{\frac{1}{3} * (Glucose \text{ concentration}_{initial} - Glucose \text{ concentration}_{final})} [g_{DCW} * g_{glucose}^{-1}]$

**Equation 4:**  $FDCA_{Produced(t)} = FDCA_{(t)} - FDCA_{(t-1)}$  [mM]

**Equation 5:**  $HMF_{conversion} = \frac{HMF_{initial} - HMF_{final}}{HMF_{initial}} * 100$  [%]

**Equation 6:**  $q_{FDCA(t)} = \frac{FDCA_{Produced(t)}}{CDW_{(t)} * time} [\mu mol_{FDCA} * g_{DCW}^{-1} * h^{-1}]$

**Equation 7:**  $Q_{FDCA(t)} = q_{FDCA(t)} * CDW_{(t)} [\mu mol_{FDCA} * L^{-1} * h^{-1}]$

**Equation 8:**  $FDCA_{Produced,total} = FDCA_{final} - FDCA_{initial} [g_{FDCA}]$

**Equation 9:**  $HMF_{Converted,total} = HMF_{initial} - HMF_{final} [g_{HMF}]$

**Equation 10:**  $Y_{FDCA/HMF} = \frac{FDCA_{Produced,total}}{HMF_{Converted,total}} [g_{FDCA} * g_{HMF}^{-1}]$

## REFERENCES

1. Kuepper, J. *et al.* Metabolic Engineering of *Pseudomonas putida* KT2440 to Produce Anthranilate from Glucose. *Frontiers in Microbiology* **6**, (2015).
2. Martínez-García, E., Nikel, P. I., Aparicio, T. & de Lorenzo, V. *Pseudomonas* 2.0: genetic upgrading of *P. putida* KT2440 as an enhanced host for heterologous gene expression. *Microbial Cell Factories* **13**, 159 (2014).
3. Batianis, C. Tailoring *Pseudomonas putida* for industrial biocatalysis. (2022) doi:10.18174/561955.
4. Salis, H. M., Mirsky, E. A., & Voigt, C. A. Automated design of synthetic ribosome binding sites to control protein expression. *Nature Biotechnology* **27**, 946-950 (2009).
